# Supplementary material
Source: MDPI journal article supplement (https://www.mdpi.com/1424-2818/14/12/1046)
Supplement: s1 [file s1]

## Supplementary material

**Table S1.** Chemical attributes of sediment from aquatic-terrestrial Alcaçuz Lagoon gradient in the coastal zone of Rio Grande do Norte, Brazil.

|                    | cmolc.dm <sup>-3</sup> |      |      |      |      | mg.dm <sup>-3</sup> |    |    |      |      |      |      |
|--------------------|------------------------|------|------|------|------|---------------------|----|----|------|------|------|------|
|                    | pH                     | Ca   | Mg   | Al   | H+Al | P                   | K  | Na | Fe   | Zn   | Cu   | Mg   |
| <b>Aquatic</b>     | 5.12                   | 0.15 | 0.11 | 0.05 | 0.63 | 1                   | 68 | 40 | 8.22 | 0.67 | 0.10 | 1.07 |
| <b>Terrestrial</b> | 5.48                   | 0.10 | 0.08 | 0.05 | 0.56 | 1                   | 76 | 42 | 3.51 | 0.89 | 0.17 | 0.95 |

cmolc.dm<sup>-3</sup>= centimolc per cubic densimeter and mg.dm<sup>-3</sup> = milligram per cubic densimeter.

**Table S2.** Percent variance explained by each of the five principal components.

| Importance of components: | PC1    | PC2    | PC3    | PC4    | PC5    |
|---------------------------|--------|--------|--------|--------|--------|
| Standard deviation        | 0.4524 | 0.3349 | 0.2570 | 0.2407 | 0.2096 |
| Proportion of Variance    | 0.3148 | 0.1725 | 0.1016 | 0.0891 | 0.0676 |
| Cumulative Proportion     | 0.31   | 0.48   | 0.58   | 0.67   | 0.74   |

**Table S3.** Multiple posteriori comparisons of species richness and glomerospore number in interactions between conditions/periods applying Tukey's correction.

| Species richness    |        |           |           |     |            |            |       |
|---------------------|--------|-----------|-----------|-----|------------|------------|-------|
| Condition           | Season | emmean    | SE        | df  | asympt.LCL | asympt.UCL | group |
| Terrestrial         | Rainy  | 1.329.136 | 0.1438536 | Inf | 1.047.188  | 1.611.084  | 1     |
| Terrestrial         | Dry    | 1.566.420 | 0.1290807 | Inf | 1.313.427  | 1.819.414  | 12    |
| Aquatic             | Rainy  | 1.859.582 | 0.1177690 | Inf | 1.628.759  | 2.090.405  | 2     |
| Aquatic             | Dry    | 1.474.402 | 0.1331203 | Inf | 1.213.491  | 1.735.313  | 12    |
| Glomerospore number |        |           |           |     |            |            |       |
| Terrestrial         | Rainy  | 3.154.870 | 0.1460293 | Inf | 2.868.658  | 3.441.083  | 1     |
| Terrestrial         | Dry    | 3.784.947 | 0.1448873 | Inf | 3.500.973  | 4.068.921  | 2     |
| Aquatic             | Rainy  | 4.130.355 | 0.1445053 | Inf | 3.847.130  | 4.413.580  | 2     |
| Aquatic             | Dry    | 3.917.272 | 0.1484850 | Inf | 3.626.247  | 4.208.298  | 2     |

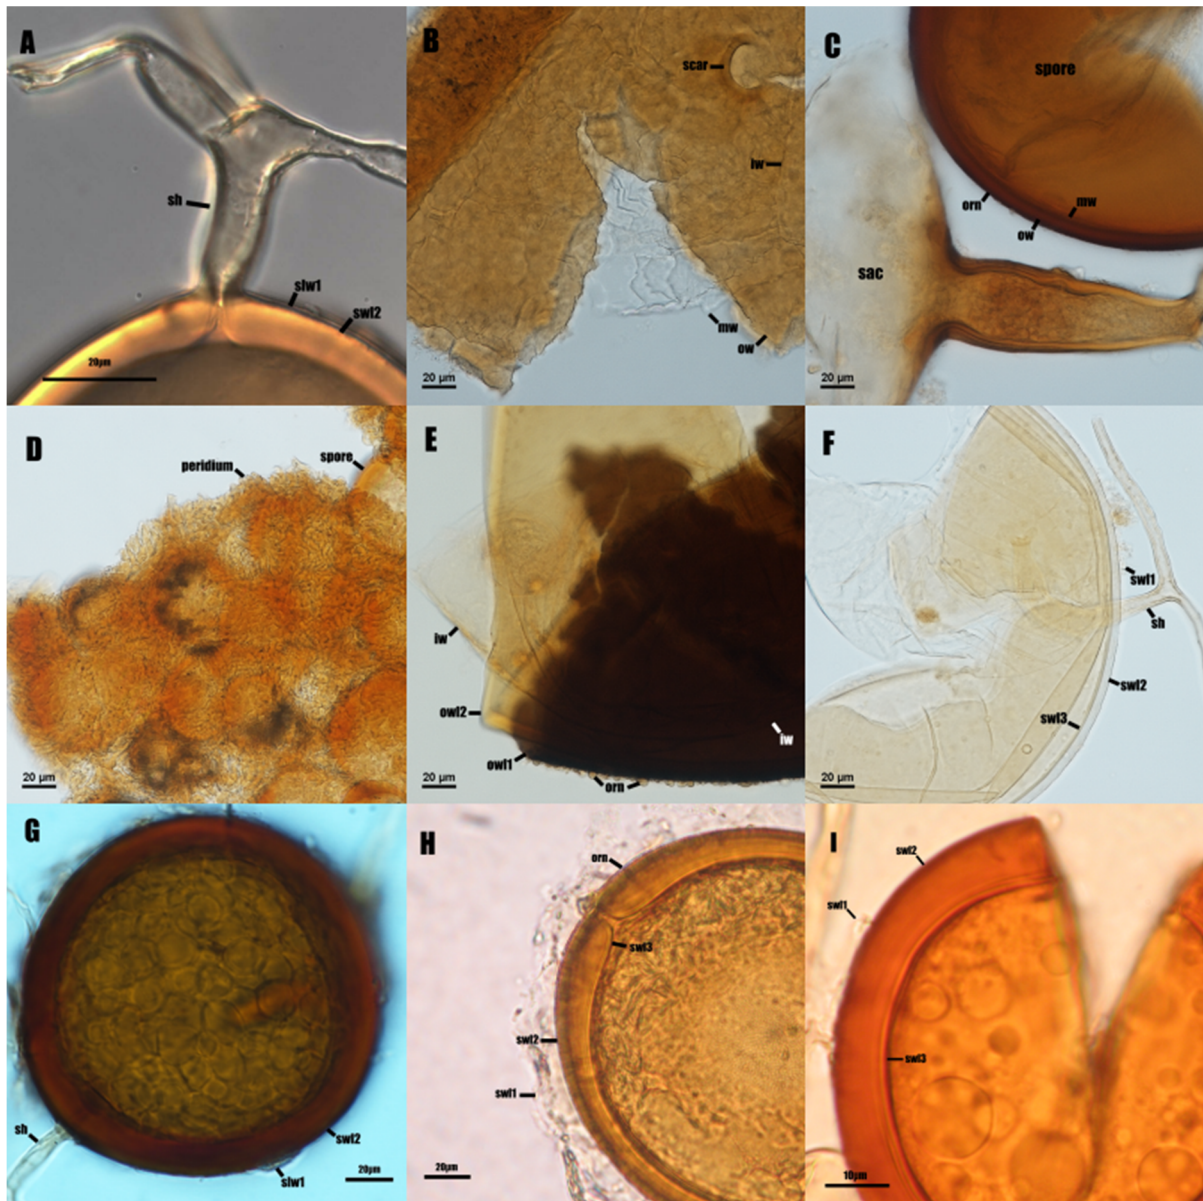

**Figure S1.** Arbuscular mycorrhizal fungi obtained from a tropical shallow lake in Rio Grande do Norte, Brazil. **A.** Detail of hyaline subtending hypha (sh) of *Glomus* cf. *brohultii*. **B.** Detail of scar and outer spore wall (ow) showing typical cracking appearance; middle (mw) and inner (iw) walls hyaline in the *Ambispora gerdemannii*. **C.** Detail of sporiferous saccule (sac) near to spore ornamented (orn) in the outer wall surface (ow) with spines, middle (mw) and inner (iw) hyaline walls also detected in *Acaulospora tuberculata*. **D.** Detail of peridium in the glomerocarp of *Sclerocystis sinuosa*. **E.** Detail of ornamentation (orn) in the black outer spore wall layer (owl1) followed by laminated yellow layer (owl2) in the *Racocetra gregaria*. **F.** Spore wall with three layers (swl1-3) and subtending hypha attached (sh) of *Rhizoglomus clarum*. **G.** Spore wall with two layers (swl1-2) and subtending hypha (sh) of *Glomus* cf. *glomerulatum*. **H.** Detail of ornamentation (orn) in the laminated spore wall layer (swl2) of *Glomus spinuliferum*. **I.** Spores of *Glomus* cf. *trufemii* 2 with three layers (swl1-3).
